# Supplementary material for: Assessment of predictive models for estimating the acute aquatic toxicity of organic chemicals
Source: Royal Society of Chemistry journal article supplement (doi:10.1039/c6gc00720a), 2016-01-01
Supplement: c6gc00720a1.pdf [file c6gc00720a1.pdf]

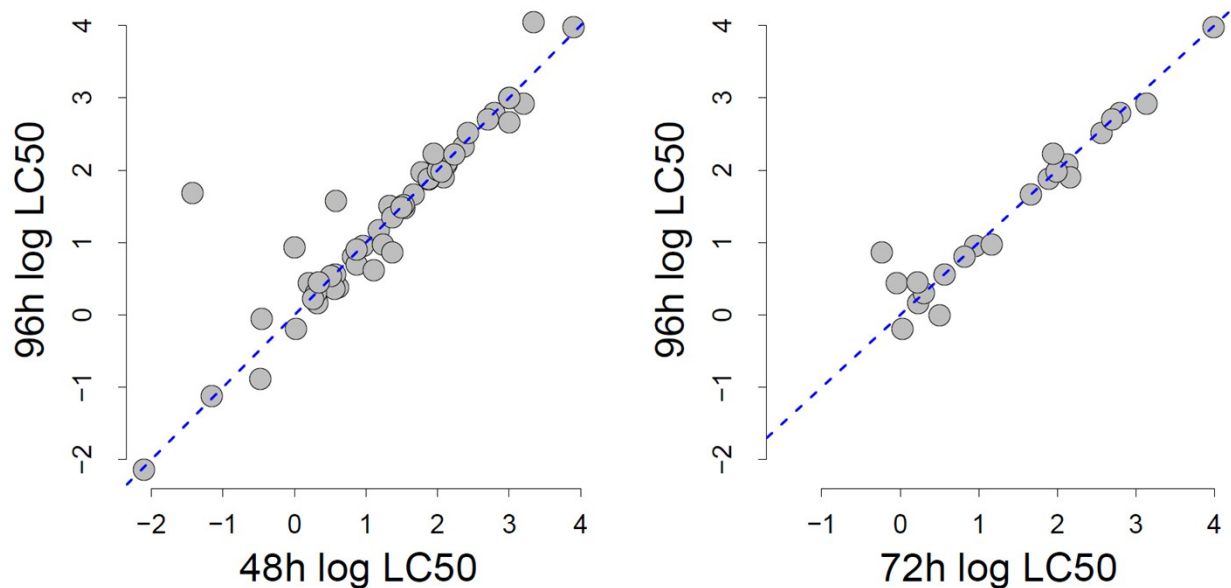

Figure S1: Correlations between  $LC_{50}$  measurements at different time. No distinction is made between fish species. Blue dashed line shows 1:1 correlation.

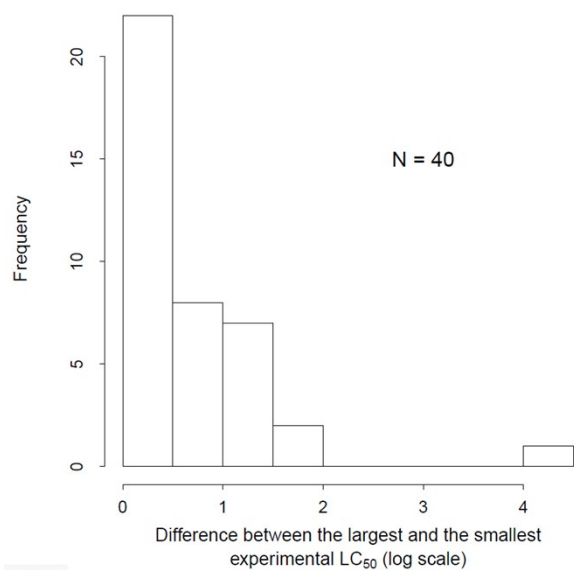

Figure S2: Distribution of differences between the minimum and the maximum experimental  $LC_{50}$  measurements; Log scale (mg/L).
