# Supplementary material for: Assessment of predictive models for estimating the acute aquatic toxicity of organic chemicals
Source: Royal Society of Chemistry journal article supplement (doi:10.1039/c6gc00720a), 2016-01-01
Supplement: c6gc00720a2.xlsx [file c6gc00720a2.xlsx]

## Sheet: TableS1
Table S1: Chemical IDs, Aquatic Toxicity Test Results, and Properties
Chemical ID			Experimental Data			Predicted Toxicity												Chemical Properties				Log P Warning	Varhaar Class
						ADMET		CADRE-AT		ECOSAR			KATE			TEST		KOWWIN log Pb	Marvinc		Formal charge
CAS	Chemical Name	Chemical Classa	LC50	note	Cat.	LC50	C.P?	Cat.	C.P?	LC50	AD?	C.P?	LC50	AD?	C.P?	LC50	C.P?		log P	log D7.4
50282	(17beta)Estra-1,3,5(10)triene-3,17-diol	Phenols	1.55433		2	0.796709	No	2	Yes	1.578	Yes	Yes	8.35	No	Yes	0.65	No	3.94	3.75	3.74	0		Class5
51218	5-Fluoro-2,4(1H,3H)pyrionidinedione	Carbonyl Ureas	2420		4	1839.84	Yes	4	Yes	590.057	Yes	Yes	NA	NA	NA	NA	NA	-0.81	-0.66	-0.81	0		Class5
52517	2-Bromo-2-nitro-1,3-propanediol	Halo Alcohols	27.5847		2	660.34	No	2	Yes	777.831	Yes	No	3230	No	No	273	No	-0.64	-0.19	-0.19	0		Class3
53861	1-(4-Chlorobenzoyl)-5-methoxy-2-methyl-1H-indole-3-acetic acid	Pyrazoles/Pyrroles -acid	81.92		2	0.761341	No	2	Yes	0.878	Yes	No	2.32	No	Yes	0.44	No	4.23	0	0.27	-1		Class5
69534	(2S,5R,6R)-6-[[(2R)-2-Amino-2-phenylacetyl]amino]-3,3-dimethyl-7-oxo-4-thia-1-azabicyclo[3.2.0]heptane-2-carboxylic acid	Aliphatic Amines-acid	1000	>	4	17.9351	No	3	No	1533.51	Yes	Yes	7920	No	Yes	1.21	No	1.45	-2	-2.26	0		Class5
74839	Bromomethane	Neutral Organics	1.82479		2	698.797	No	2	Yes	428.627	Yes	No	220	Yes	No	554	No	1.18	1.02	1.02	0		Class1
74873	Chloromethane	Neutral Organics	550		4	639.495	Yes	4	Yes	274.286	Yes	No	194	Yes	No	415	No	1.09	0.84	0.84	0		Class1
74884	Iodomethane	Neutral Organics	1.25805		2	390.571	No	2	Yes	271.717	Yes	No	185	No	No	588	No	1.59	1.56	1.56	0		Class5
74895	Methanamine	Aliphatic Amines	236.643		3	6348.78	No	3	Yes	322.972	Yes	Yes	NA	NA	NA	793	No	-0.64	-3.66	-3.15	1		Class5
75047	Ethanamine	Aliphatic Amines	1000		4	1511.91	Yes	4	Yes	223.035	Yes	No	NA	NA	NA	790	Yes	-0.15	-3.3	-2.89	1		Class5
75310	Isopropyl amine	Aliphatic Amines	1000		4	1056.46	Yes	4	Yes	155.473	Yes	No	NA	NA	NA	902	Yes	0.27	-2.89	-2.58	1		Class5
75569	2-Methyloxirane	Epoxides, mono	215		3	2372.85	No	3	Yes	44.983	Yes	No	3.86	Yes	No	136	Yes	0.37	0.37	0.37	0		Class3
75865	Acetone cyanohydrin	Nitrile Alpha-OH	0.57		1	536.307	No	4	No	0.933	Yes	Yes	3450	Yes	No	377	No	-0.03	0.02	0.02	0		Class3
77781	Dimethyl sulfate	Esters	7.5		2	4118.65	No	2	Yes	200.095	Yes	No	1040	No	No	67.3	Yes	0.16	-0.09	-0.09	0		Class5
78400	Triethyl phosphate	Esters (phosphate)	100	>	3	582.455	Yes	4	Yes	9.829	Yes	No	1740	Yes	Yes	85	No	0.87	1.18	1.18	0		Class5
79094	Propanoic acid	Neutral Organics-acid	87.2481		2	2738.61	No	2	Yes	11521	No	No	1900	Yes	No	248	No	0.58	-3.05	-2.12	-1		Class5
79334	(2S)-2-Hydroxypropanoic acid	Neutral Organics-acid	130		3	19092.8	No	3	Yes	177000	No	No	16.4	Yes	No	1680	No	-0.65	-4	-3.74	-1		Class5
79925	Camphene	Neutral Organics	1.17		2	1.53423	Yes	2	Yes	0.873	Yes	No	0.714	Yes	No	3.07	Yes	4.35	2.86	2.86	0		Class1
81776	6,15-Dihydro-5,9,14,18-anthrazinetetrone	Neutral Organics	46		2	0.025724	No	2	Yes	0.003	No	No	NA	NA	NA	0.0126	No	7.73	7.37	7.37	0		Class5
81812	4-Hydroxy-3-(3-oxo-1-phenylbutyl)-2H-1-benzopyran-2-one	Vinyl/Allyl Alcohols	49.1885		2	0.422019	No	2	Yes	5.511	Yes	Yes	43.5	No	Yes	5.3	Yes	2.23	-0.01	1.75	-1		Class1
88993	1,2-Benzenedicarboxylic acid	Neutral Organics-acid	1000	>	4	2078.75	Yes	3	No	9323.4	No	Yes	NA	NA	NA	38.4	No	1.07	-5.77	-4.1	-2		Class5
89985	o-Chlorobenzaldehyde	Aldehydes (Mono)	2.61916		2	5.61528	Yes	1	No	5.238	Yes	Yes	5.75	Yes	Yes	6.35	Yes	2.35	2.29	2.29	0		Class3
94962	2-Ethyl-1,3-hexanediol	Neutral Organics	624		4	1186.86	Yes	4	Yes	274.714	Yes	No	580	Yes	Yes	364	No	1.6	1.16	1.16	0		Class1
96457	2-Imidazolidinethione	Thioureas	502	>	4	324.195	No	3	No	79928	Yes	Yes	2790	No	Yes	273	No	-0.49	-0.2	-0.2	0		Class5
98099	Benzenesulfonyl chloride	Acid Halides	3		2	3251.2	No	2	Yes	3.82	Yes	Yes	NA	NA	NA	31.9	Yes	2.94	1.92	1.92	0		Class5
98555	alpha-Terpineol	Neutral Organics	6.53213		2	32.0718	Yes	2	Yes	8.068	Yes	Yes	32.1	Yes	Yes	28.2	Yes	3.33	2.17	2.17	0		Class5
100005	1-Chloro-4-nitrobenzene	Neutral Organics	15		2	10.9016	Yes	1	No	50.492	Yes	Yes	18.6	Yes	Yes	9.67	Yes	2.46	2.52	2.52	0		Class2
104552	3-Phenyl-2-propenal	Vinyl/Allyl Aldehydes	4.63951		2	1.07269	Yes	2	Yes	0.201	Yes	No	8.74	No	Yes	NA	NA	1.82	1.98	1.98	0		Class3
106934	1,2-Dibromoethane	Neutral Organics	24.3541		2	27.8747	Yes	2	Yes	150.98	Yes	No	108	Yes	No	14.9	Yes	2.01	1.87	1.87	0		Class1
107926	Butanoic acid	Neutral Organics-acid	65		2	1404.79	No	2	Yes	4962.98	No	No	NA	NA	NA	139	No	1.07	-2.61	-1.53	-1		Class5
108316	2,5-Furandione	Neutral Organics	138		3	3.17569	No	3	Yes	177.228	No	Yes	NA	NA	NA	NA	NA	1.62	0.56	0.56	0		Class3
111400	N-(2-Aminoethyl)-1,2-ethanediamine	Aliphatic Amines	1000		4	736.634	Yes	4	Yes	10281	Yes	Yes	NA	NA	NA	1250	Yes	-2.13	-7.85	-5.67	2		Class5
111557	1,2-Ethanediol, Diacetate	Esters	90		2	40.3589	Yes	2	Yes	166.908	Yes	No	297	Yes	No	130	No	0.4	-0.33	-0.33	0		Class5
111660	1-Octene	Neutral Organics	3.66309		2	1.27103	Yes	2	Yes	1.118	Yes	Yes	0.758	Yes	No	1.18	Yes	4.13	3.72	3.72	0		Class1
111773	2-(2-Methoxyethoxy)ethanol	Neutral Organics	2683.28		4	19514.3	Yes	4	Yes	71001.7	Yes	Yes	22400	Yes	Yes	14800	Yes	-1.18	-0.61	-0.61	0		Class5
112027	N,N,N-Trimethyl-1-hexadecanaminium, Chloride	Neutral Organics	0.158114		1	0.92412	Yes	1	Yes	22.682	Yes	No	NA	NA	NA	NA	NA	3.18	2.69	2.69	1		Class5
112298	1-Bromodecane	Neutral Organics	18.7		2	0.295036	No	2	Yes	0.107	No	No	0.0869	Yes	No	0.42	No	5.6	5.01	5.01	0		Class1
112345	2-(2-Butoxyethoxy)ethanol	Neutral Organics	1300		4	1285.47	Yes	4	Yes	4555.22	Yes	Yes	2000	Yes	Yes	750	Yes	0.29	0.71	0.71	0		Class1
120514	Benzoic acid, Phenylmethyl ester	Esters	1.4		2	1.97036	Yes	2	Yes	3.597	Yes	Yes	2.8	No	Yes	1.65	Yes	3.54	3.7	3.7	0		Class5
123966	2-Octanol	Neutral Organics	75		2	36.1517	Yes	2	Yes	23.55	Yes	Yes	21.9	Yes	Yes	24.2	Yes	2.73	2.56	2.56	0		Class1
124185	Decane	Neutral Organics	530	>	4	1.46954	No	1	No	0.14	No	No	0.0632	Yes	No	0.59	No	5.25	4.91	4.91	0		Class1
124630	Methanesulfonyl chloride	Acid Halides	11		2	38841.2	No	2	Yes	16.081	Yes	Yes	11.8	No	Yes	98.3	Yes	1.27	-0.19	-0.19	0		Class5
127195	N,N-Dimethyl acetamide	Amides	1000		4	2339.06	Yes	4	Yes	1557.59	Yes	Yes	NA	NA	NA	1180	Yes	-0.49	-0.58	-0.58	0		Class5
134327	1-Aminonaphthalene	Anilines (Unhindered)	7		2	6.95833	Yes	2	Yes	13.63	Yes	Yes	NA	NA	NA	13.9	Yes	2.25	2.13	2.13	0		Class2
140114	Benzyl acetate	Esters	4		2	13.623	Yes	2	Yes	18.008	Yes	Yes	21.3	No	Yes	38.4	Yes	2.08	1.65	1.65	0		Class5
288880	1H-1,2,4-Triazole	Triazoles (Non-Fused)	498		3	330.956	Yes	3	Yes	3574.15	Yes	No	NA	NA	NA	NA	NA	-0.76	-0.41	-0.42	0		Class5
420042	Cyanamide	Neutral Organics	90.1732		2	189.528	No	4	No	11597.2	No	No	568	Yes	No	NA	NA	-0.81	-0.64	-0.64	0		Class5
482893	2-(1,3-Dihydro-3-oxo-2H-indol-2-ylidene)-1,2-dihydro-3H-indol-3-one	Vinyl/Allyl Ketones	42		2	2.54464	Yes	1	No	37.704	Yes	Yes	NA	NA	NA	0.2	No	3.11	2.65	2.58	0		Class5
548629	N-[4-[Bis[4-(dimethylamino)phenyl]methylene]-2,5-cyclohexadien-1-ylidene]-N-methylmethanaminiumchloride (1:1)	Neutral Organics	0.1		1	0.106657	Yes	1	Yes	2770.57	No	No	NA	NA	NA	NA	NA	0.98	2.35	2.36	1	yes	Class5
556887	Nitroguanidine	Aliphatic Amines	2268.48	>	4	51.2836	No	4	Yes	5563.14	Yes	Yes	55900	No	Yes	NA	NA	-1.72	-1.44	-1.44	0		Class5
583788	2,5-Dichlorophenol	Phenols	3.3		2	12.2868	Yes	2	Yes	6.959	Yes	Yes	5.42	Yes	Yes	5.93	Yes	2.8	0.8	2.49	-1		Class5
631618	Acetic acid, Ammonium salt (1:1)	Neutral Organics	72		2	NA	NA	2	Yes	1270000	No	No	NA	NA	NA	NA	NA	-2.79	-3.75	-3	-1		Class5
994058	2-Methoxy-2-methylbutane	Neutral Organics	100	>	3	315.094	Yes	4	Yes	98.977	Yes	No	167	Yes	Yes	403	Yes	1.92	1.7	1.7	0		Class1
1111780	Carbamic acid, Monoammonium salt	Neutral Organics	40.6		2	NA	NA	4	No	7970000	No	No	NA	NA	NA	NA	NA	-3.67	-4.09	-3.76	-1		Class4
1570645	4-Chloro-2-methylphenol	Phenols	2.3		2	15.6842	Yes	2	Yes	7.216	Yes	Yes	7.54	Yes	Yes	8.53	Yes	2.7	2.79	2.78	0		Class2
1948330	2-(1,1-Dimethylethyl)-1,4-benzenediol	Hydroquinones	0.273841		1	10.837	No	1	Yes	0.099	Yes	Yes	NA	NA	NA	21	No	2.94	2.91	2.91	0		Class5
2008391	2-(2,4-Dichlorophenoxy)acetic acid compd. with N-methylmethanamine (1:1)	Neutral Organics	312.304		3	NA	NA	3	Yes	2427.03	No	No	NA	NA	NA	NA	NA	0.84	-1.03	-0.99	-1		Class1
2312358	2-[4-(1,1-Dimethylethyl)phenoxy]cyclohexyl-2-propynyl ester sulfurous acid	Neutral Organics	0.153569		1	0.510232	Yes	NA	NA	0.18	No	Yes	0.218	No	Yes	1.1	No	5.57	4.71	4.71	0		Class5
2372829	N1-(3-Aminopropyl)-N1-dodecyl-1,3-propanediamine	Aliphatic Amines	1.00846		2	0.0784423	No	2	Yes	1.386	Yes	Yes	0.586	Yes	No	NA	NA	4.46	-2.47	-1.67	2		Class2
2896700	Tanone 50	Aliphatic Amines	0.01249		1	107.19	No	NA	NA	626.534	Yes	No	NA	NA	NA	NA	NA	0.05	0.89	0.89	0		Class5
3209221	1,2-Dichloro-3-nitrobenzene	Neutral Organics	12.0167		2	7.45363	Yes	2	Yes	16.228	Yes	Yes	8.1	Yes	Yes	7.82	Yes	3.1	3.12	3.12	0		Class2
3380301	5-Chloro-2-(4-chlorophenoxy)phenol,	NA	0.46	>	1	NA	NA	1	Yes	NA	NA	NA	NA	NA	NA	NA	NA	-1.23	4.38	4.2	0	yes	Class1
3547339	2-(Octylthio)ethanol	Neutral Organics	2.84956		2	1.95599	Yes	2	Yes	8.953	Yes	Yes	3.13	No	Yes	2.37	Yes	3.38	3.27	3.27	0		Class5
5567157	CI Pigment Yellow 83	Amides	40.166		2	0.00172844	No	NA	NA	0.027	No	No	NA	NA	NA	NA	NA	7.54	8.51	8.51	0		Class5
6440580	1,3-bis(Hydroxymethyl)-5,5-dimethyl-2,4-imidazolidinedione	Carbonyl Ureas	298.198		3	11660.1	No	3	Yes	6330.68	Yes	No	2970	Yes	No	6890	No	-2.37	-1.16	-1.16	0	yes	Class5
7173515	N-Decyl-N,N-dimethyl-1-decanaminium chloride (1:1)	Neutral Organics	0.750417		1	0.000439613	Yes	1	Yes	1.219	Yes	No	4.57e-06	No	Yes	NA	NA	4.66	4.01	4.01	1		Class5
7398698	Dimethyldiallylammonium chloride	Neutral Organics	1.10272		2	0.111833	No	4	No	1430000	No	No	NA	NA	NA	NA	NA	-2.49	-2.51	-2.51	1		Class1
7747355	7a-Ethyldihydro-1H,3H,5H-oxazolo[3,4-c]oxazole	Aliphatic Amines	169.499		3	1555.16	No	3	Yes	308.198	Yes	Yes	73.2	Yes	No	2410	No	0.4	0.84	0.84	0		Class5
9003138	1-(1-butoxypropan-2-yloxy)propan-2-ol	Neutral Organics	50		2	2904.56	No	2	Yes	45354.1	Yes	No	7410	Yes	No	NA	NA	-0.53	1.54	1.54	0	yes	Class1
9016459	alpha-(Nonylphenyl)-omega-hydroxypoly(oxy-1,2-ethanediyl)	Neutral Organics	5.53976		2	2.63436	Yes	2	Yes	2.151	No	Yes	0.181	Yes	No	NA	NA	4.48	5.15	5.15	0		Class1
10543574	N,N'-1,2-Ethanediylbis N-acetylacetamide	Imides	140	>	3	52.0312	No	4	Yes	1910.99	Yes	Yes	1820	Yes	Yes	NA	NA	-2.36	-1.81	-1.81	0		Class5
13674878	1,3-Dichloro-2-propanol phosphate (3:1)	Esters (phosphate)	3.6		2	2.57474	Yes	2	Yes	2.474	Yes	Yes	902	No	No	0.65	No	3.65	4.28	4.28	0		Class5
14433762	N,N-Dimethyldecanamide	Amides	21		2	11.813	Yes	2	Yes	5.526	Yes	Yes	6.86	Yes	Yes	NA	NA	3.44	3.23	3.23	0		Class5
15687271	alpha-Methyl-4-(2-methylpropyl)benzeneacetic acid	Neutral Organics-acid	100	>	3	28.5922	No	3	Yes	41.561	No	No	19.4	Yes	No	2.55	No	3.79	0.31	1.34	-1		Class5
16484778	(2R)-2-(4-Chloro-2-methylphenoxy)propanoic acid	Neutral Organics-acid	97	>	2	38.4619	Yes	3	Yes	253.672	No	Yes	10.4	No	Yes	21	Yes	2.94	-0.55	-0.41	-1		Class1
25322694	Polypropylene glycol	Neutral Organics	4123.11		4	9252.74	Yes	4	Yes	24424.4	Yes	Yes	19000	Yes	Yes	NA	NA	-0.21	-0.42	-0.42	0		Class1
26787780	[2S-[2alpha,5alpha,6beta(S*)]]-6-[[Amino(4-hydroxyphenyl)acetyl]amino]-3,3-dimethyl-7-oxo-4-thia-1-azabicyclo[3.2.0]heptane-2-carboxylic acid	Phenol Amines -acid	1000	>	4	38.4693	No	3	No	370.208	Yes	No	20400	No	Yes	2.27	No	0.97	-2.31	-2.57	0		Class5
55566308	Tetrkis(hydroxymethyl)phosphonium, Sulfate(2:1)(salt)	Neutral Organics	95.4882		2	1.02536e+06	No	4	No	4.26e+22	No	No	NA	NA	NA	NA	NA	-20.39	-3.49	-3.49	1	yes	Class5
77501634	5-[2-Chloro-4-(trifluoromethyl)phenoxy]-2-nitrobenzoic acid, 2-Ethoxy-1-methyl-2-oxoethyl ester	Esters	0.527965		1	0.0609114	Yes	2	Yes	1.218	No	No	0.923	No	Yes	0.0283	Yes	4.92	5.45	5.45	0		Class5
78491028	N-[1,3-Bis(hydroxymethyl)-2,5-dioxo-4-imidazolidinyl]-N,N'-bis(hydroxymethyl)urea	Carbonyl Ureas	150	>	3	9005.58	Yes	4	Yes	6700000	Yes	Yes	9240	Yes	Yes	2760	Yes	-7.49	-3.79	-3.79	0	yes	Class5
99607702	2-[(5-Chloro-8-quinolinyl)oxy]acetic acid, 1-Methylhexyl ester	Esters	13.2982	>	2	0.808813	No	2	Yes	0.544	No	No	0.502	No	No	0.63	No	5.28	4.83	4.83	0		Class5
134605644	2-Chloro-5-[3,6-dihydro-3-methyl-2,6-dioxo-4-(trifluoromethyl)-1(2H)-pyrimidinyl]benzoic acid 1,1-dimethyl-2-oxo-2-(2-propenyloxy)ethyl ester	NA	6.02246		2	NA	NA	2	Yes	NA	NA	NA	NA	NA	NA	0.0954	No	-1.23	4.01	4.01	0	yes	Class5
135590919	1-(2,4-Dichlorophenyl)-4,5-dihydro-5-methyl-1H-pyrazole-3,5-dicarboxylic acid 3,5-diethyl ester	Esters	4.2		2	0.196108	No	1	No	1.128	Yes	Yes	1.97	No	Yes	0.37	No	4.82	4.74	4.74	0		Class5
a - chemical class as identified by ECOSAR tool b - Log P estimated provided by the KOWWIN module of the ECOSAR tool c - Log P and log D estimated by ChemAxon Marvin software Cat. - regulatory category (1-4); AD - indicated weather the chemical is in the applicability domain; C.P? - indicates correct and incorrect predictions based on regulatory categories; NA - Not Available

## Sheet: Table S2
Table S2: Experimental LC50 threshhold values for chemicals with large LC50 ranges
CAS	Species.Scientific.Name	Test Duration	LC50 note	LC50 (mg/L)
50282	Oryzias latipes	4		2e-06
50282	Oryzias latipes	3		3.5
50282	Oryzias latipes	3		3.5
50282	Oryzias latipes	3		0.46
50282	Oryzias latipes	3		3.5
50282	Oryzias latipes	3		0.46
77736	Ictalurus punctatus	2		20
77736	Ictalurus punctatus	4		15.7
77736	Lepomis macrochirus	2		17.8
77736	Lepomis macrochirus	2		24.6
77736	Lepomis macrochirus	2		27.1
77736	Lepomis macrochirus	2		28.7
77736	Lepomis macrochirus	2		28.7
77736	Lepomis macrochirus	2		30.7
77736	Lepomis macrochirus	2		31.1
77736	Lepomis macrochirus	2		34.6
77736	Lepomis macrochirus	2		35.1
77736	Lepomis macrochirus	2		35.5
77736	Lepomis macrochirus	2		37.6
77736	Lepomis macrochirus	2		44.3
77736	Lepomis macrochirus	2		45.4
77736	Lepomis macrochirus	2		60.4
77736	Lepomis macrochirus	4		14.2
77736	Lepomis macrochirus	4		23.3
77736	Lepomis macrochirus	4		23.4
77736	Lepomis macrochirus	4		24.2
77736	Lepomis macrochirus	4		25.7
77736	Lepomis macrochirus	4		27.1
77736	Lepomis macrochirus	4		27.8
77736	Lepomis macrochirus	4		31.7
77736	Lepomis macrochirus	4		34.6
77736	Lepomis macrochirus	4		34.8
77736	Lepomis macrochirus	4		36.8
77736	Lepomis macrochirus	4		37.6
77736	Lepomis macrochirus	4		44.3
77736	Lepomis macrochirus	4		47.5
77736	Oryzias latipes	2		1.4
77736	Pimephales promelas	2		103
77736	Pimephales promelas	2		12.7
77736	Pimephales promelas	2		2550
77736	Pimephales promelas	2		31.1
77736	Pimephales promelas	2		86.3
77736	Pimephales promelas	4		103
77736	Pimephales promelas	4		12
77736	Pimephales promelas	4		31.1
77736	Pimephales promelas	4		86.3
77736	Pimephales promelas	6		2390
77736	Oncorhynchus mykiss	2		15.9
77736	Oncorhynchus mykiss	4		15.9
81812	Ictalurus punctatus	2		0.0377
81812	Ictalurus punctatus	4		0.0343
81812	Lepomis macrochirus	4	>	17.5
81812	Lepomis macrochirus	4		750
81812	Lepomis macrochirus	4		88
81812	Oncorhynchus mykiss	4	>	1000
81812	Oncorhynchus mykiss	4	>	1000
81812	Oncorhynchus mykiss	4	>	16
109864	Lepomis macrochirus	4	>	100
109864	Lepomis macrochirus	4	>	10000
109864	Oryzias latipes	2	>	1000
109864	Oryzias latipes	2	>	1000
109864	Oryzias latipes	2	>	1000
109864	Oncorhynchus mykiss	4	>	100
121824	Danio rerio	4		0.02298
121824	Danio rerio	4		0.02564
121824	Ictalurus punctatus	4		13
121824	Ictalurus punctatus	2		6
121824	Ictalurus punctatus	4		4.1
121824	Lepomis macrochirus	4		7.6
121824	Lepomis macrochirus	2		8.5
121824	Lepomis macrochirus	4		3.6
121824	Lepomis macrochirus	4		3.7
121824	Lepomis macrochirus	4		3.8
121824	Lepomis macrochirus	4		3.9
121824	Lepomis macrochirus	4		3.9
121824	Lepomis macrochirus	4		4.1
121824	Lepomis macrochirus	4		4.8
121824	Lepomis macrochirus	4		4.8
121824	Lepomis macrochirus	4		4.8
121824	Lepomis macrochirus	4		5.1
121824	Lepomis macrochirus	4		5.1
121824	Lepomis macrochirus	4		5.3
121824	Lepomis macrochirus	4		6
121824	Lepomis macrochirus	4		8.4
121824	Pimephales promelas	4		12.7
121824	Pimephales promelas	4		6.6
121824	Pimephales promelas	2		5.8
121824	Pimephales promelas	2	>	100
121824	Pimephales promelas	2		11
121824	Pimephales promelas	2		16
121824	Pimephales promelas	2		18
121824	Pimephales promelas	4		11
121824	Pimephales promelas	4		16
121824	Pimephales promelas	4		3.8
121824	Pimephales promelas	4		43
121824	Pimephales promelas	4		5.8
121824	Pimephales promelas	6	>	100
121824	Pimephales promelas	4		4.5
121824	Oncorhynchus mykiss	2		7
121824	Oncorhynchus mykiss	4		6.4
1330785	Danio rerio	4	>	1
1330785	Danio rerio	4	>	1
1330785	Danio rerio	4		0.4
1330785	Danio rerio	4		5.9
1330785	Ictalurus punctatus	4		0.8
1330785	Jordanella floridae	2		3.1
1330785	Jordanella floridae	2		6.7
1330785	Jordanella floridae	4		2.1
1330785	Jordanella floridae	4		5
1330785	Lepomis macrochirus	4		0.15
1330785	Lepomis macrochirus	4		0.082
1330785	Lepomis macrochirus	4	>	100
1330785	Lepomis macrochirus	4	>	100
1330785	Lepomis macrochirus	4	>	100
1330785	Lepomis macrochirus	4	>	100
1330785	Lepomis macrochirus	4	>	100
1330785	Lepomis macrochirus	4	>	100
1330785	Lepomis macrochirus	4	>	100
1330785	Lepomis macrochirus	4	>	100
1330785	Lepomis macrochirus	4		29
1330785	Lepomis macrochirus	4		7000
1330785	Oryzias latipes	2		53
1330785	Oryzias latipes	4		13
1330785	Oryzias latipes	2	>	1000
1330785	Oryzias latipes	2		5.8
1330785	Oryzias latipes	2		700
1330785	Gasterosteus aculeatus	2		0.83
1330785	Gasterosteus aculeatus	3		0.58
1330785	Gasterosteus aculeatus	4		0.44
1330785	Oncorhynchus mykiss	4		0.26
1330785	Oncorhynchus mykiss	4		0.4
1330785	Oncorhynchus mykiss	4		4.5
1330785	Oncorhynchus mykiss	4		5.5
1330785	Oncorhynchus mykiss	4		5.5
1330785	Oncorhynchus mykiss	4		6
1330785	Oncorhynchus mykiss	4		6.5
1330785	Oncorhynchus mykiss	4		6.6
1330785	Oncorhynchus mykiss	4		6.8
1330785	Oncorhynchus mykiss	4		7.2
1330785	Oncorhynchus mykiss	4		7.5
3380345	Lepomis macrochirus	4		36.2
3380345	Lepomis macrochirus	4		0.37
3380345	Oryzias latipes	2		0.352
3380345	Oryzias latipes	4		0.399
3380345	Oryzias latipes	4		0.602
3380345	Oryzias latipes	4		0.6
3380345	Pimephales promelas	4		0.25
3380345	Pimephales promelas	4		0.36
3380345	Pimephales promelas	4		0.26
3380345	Oncorhynchus mykiss	4		23.4
3380345	Oncorhynchus mykiss	4		0.288
9016459	Danio rerio	4		5
9016459	Lepomis macrochirus	4	>	10
9016459	Lepomis macrochirus	4	>	1000
9016459	Lepomis macrochirus	4		1.3
9016459	Lepomis macrochirus	4		7.6
9016459	Lepomis macrochirus	4		7.9
9016459	Oryzias latipes	2		10
9016459	Oryzias latipes	2		27
9016459	Oryzias latipes	2		1.4
9016459	Pimephales promelas	6		2.9
9016459	Salmo trutta	2		7.5
9016459	Oncorhynchus mykiss	4		4.7

## Sheet: Table 1 - old
	Admet Predictor	CADRE.AT	ECOSARa	KATEa	TEST
Total Accuracy (%)	0.53	0.82	0.51	0.58	0.48
Usable Accuracy (%)b	0.49	0.8	0.49	0.4	0.35
Number of missing predictions (out of 83)	5	3	2	26	23
Inside AD Accuracy (%)c	--	--	0.61	0.46	--
Predictions within 1 regulatry category	80.7692	92.5	85.1852	85.9649	91.5663
Predictions within a factor of 2 (%)	25.64	NAe	32.08	22.86	30
Predictions within a factor of 5 (%)	48.72	NAe	67.92	54.29	50
Predictions within a factor of 10 (%)*	57.69	NAe	75.47	68.57	63.33
Predictions within a factor of 100 (%)	80.77	NAe	92.45	85.71	85
Predictions within a factor of 1000 (%)	91.03	NAe	98.11	94.29	98.33
Number of chemicals (out of 83)d	78	80	61	35	57
a - this software provides predictions even when chemicals lie outside the Applicability Domain (AD). For these programs a the total accuracy and the accuracy withing the AD are given. b - predidictive power measures the total number of correct predictions in the set of 83 chemicals. Lack of prediction is treated as incorrect prediction. c - provides accuracy for chemicals inside the applicabilit…
